# Supplementary material
Source: ML conference proceedings conference paper supplement (https://openaccess.thecvf.com/content/CVPR_2019/html/Wu_MVF-Net_Multi-View_3D_CVPR_2019_paper.html)

# Supplementary Material for MVF-Net: Multi-View 3D Face Morphable Model Regression

## 1. Content

In this supplementary, we provide the following contents:

- visual results with neutral faces compared with state-of-the-art-methods.
- results on face video with different expressions compared with [3]. This is provided in a video file named **videodata.avi**.

## 2. Neutral Faces Results

We test our method on the FEI Face Database which is available on [1]. There are 14 images for each of 200 individuals, a total of 2800 images. Figures on pages 2, 3, 4 show the comparisons between the proposed methods and state-of-the-art methods. For our method, we showed the reconstructed facial geometry. For [4][3][2], we show the pooled facial geometry from three input images. The visual results demonstrate that our method outperforms the others on face images with distinct appearances.

## 3. Expressional Faces Results

We also provide results on a spontaneous video shot with three cameras in **videodata.avi**. We test the video data frame by frame without temporal smoothing. Compared with [3], our result shows the facial geometry with higher fidelity and more accurate expressions.

## References

- [1] C. U. d. F. Department of Electrical Engineering. Fei face database, 2006. 1
- [2] K. Genova, F. Cole, A. Maschinot, A. Sarna, D. Vlastic, and W. T. Freeman. Unsupervised training for 3d morphable model regression. In *CVPR*, pages 8377–8386, 2018. 1
- [3] A. Tewari, M. Zollhöfer, H. Kim, P. Garrido, F. Bernard, P. Pérez, and C. Theobalt. Mofa: Model-based deep convolutional face autoencoder for unsupervised monocular reconstruction. In *ICCV*, volume 2, page 5, 2017. 1
- [4] A. T. Tran, T. Hassner, I. Masi, and G. Medioni. Regressing robust and discriminative 3d morphable models with a very deep neural network. In *CVPR*, pages 1493–1502. IEEE, 2017. 1

Input

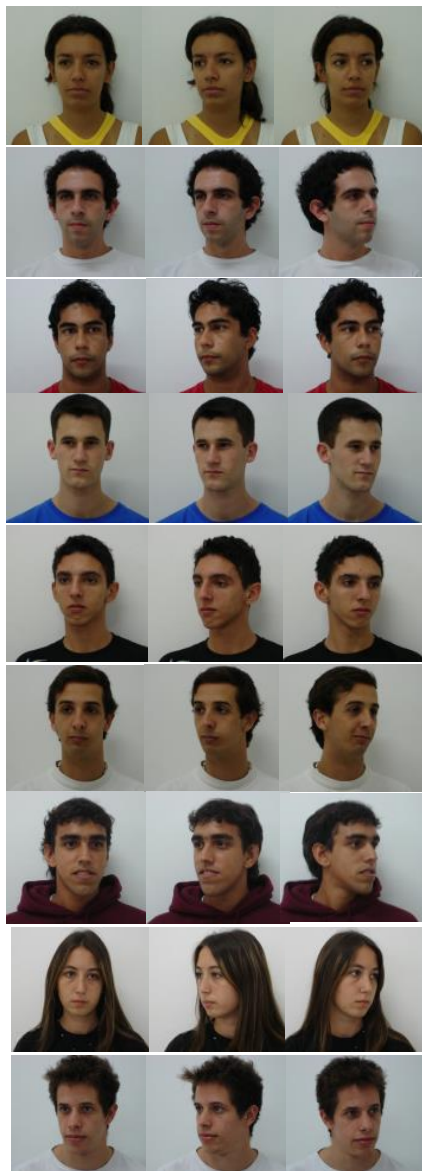

Our

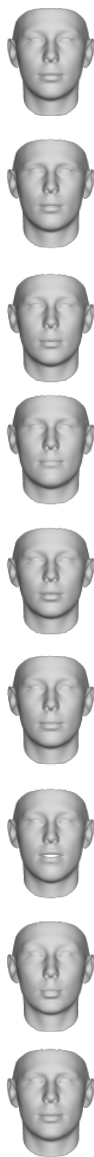

Tran17

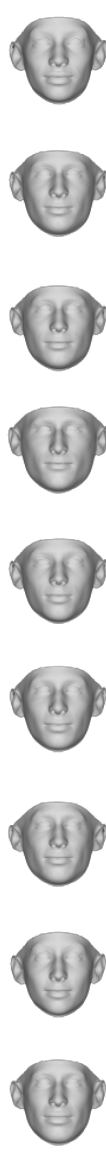

MoFA

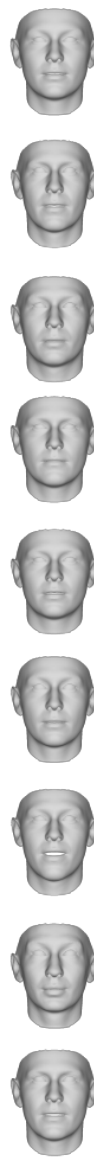

Genova18

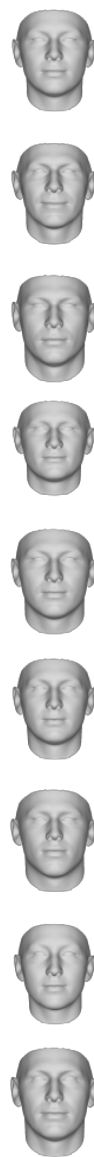

Input

Our

Tran17

MoFA

Genova18

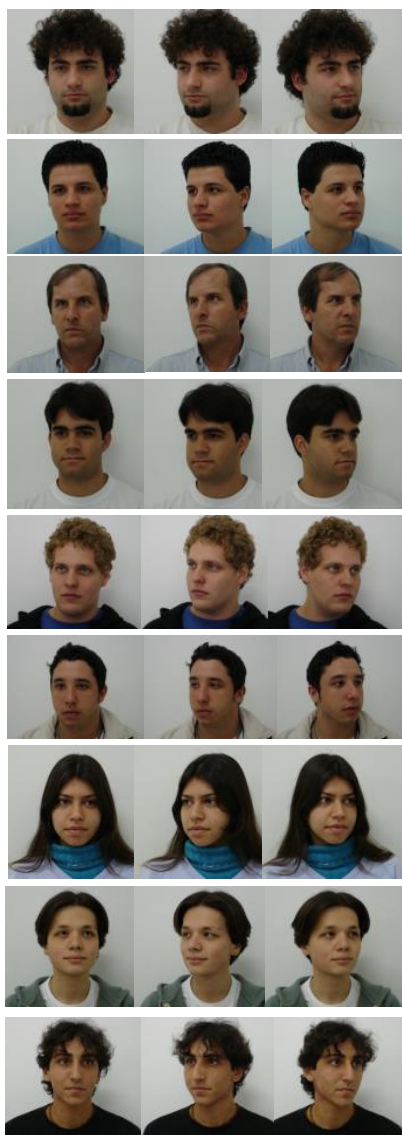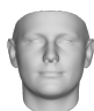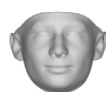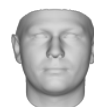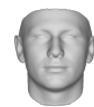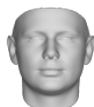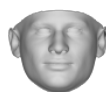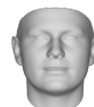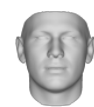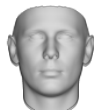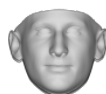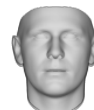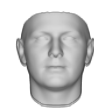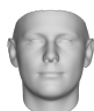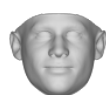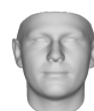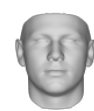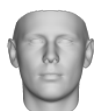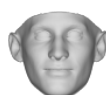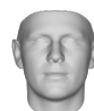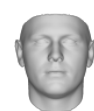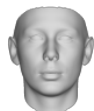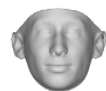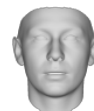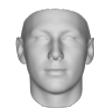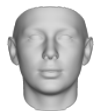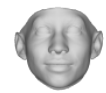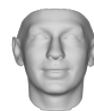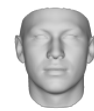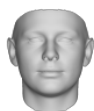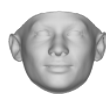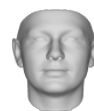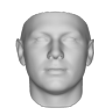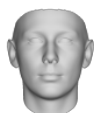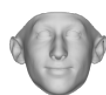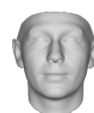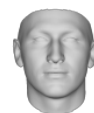

Input

Our

Tran17

MoFA

Genova18

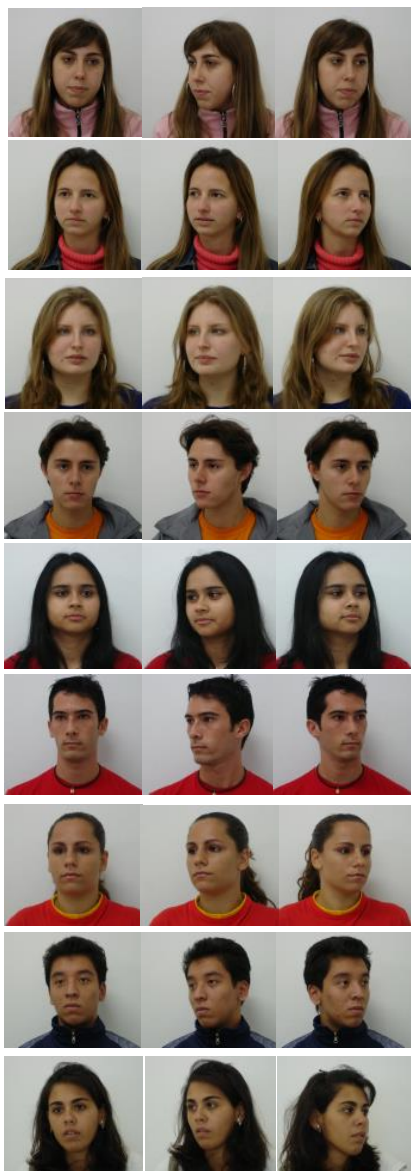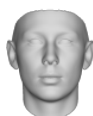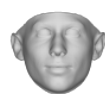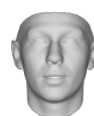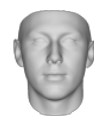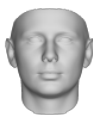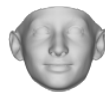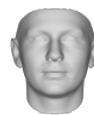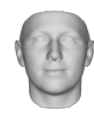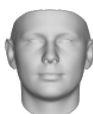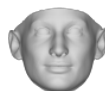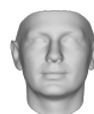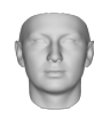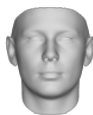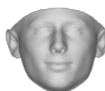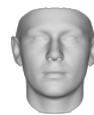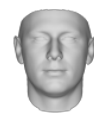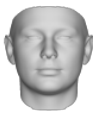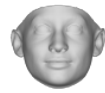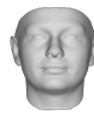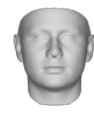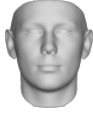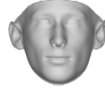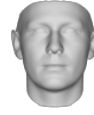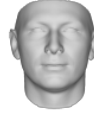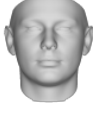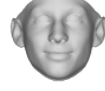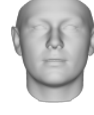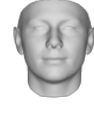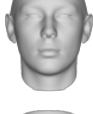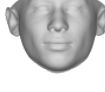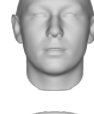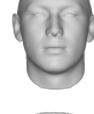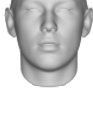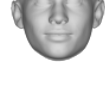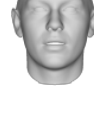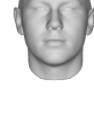

Input

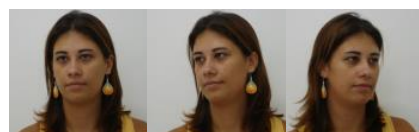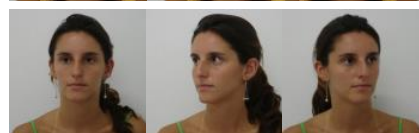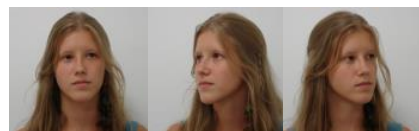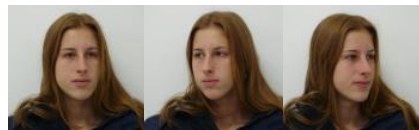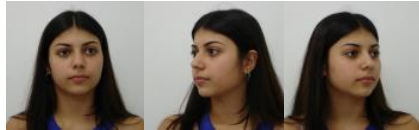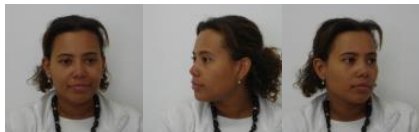

Our

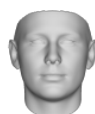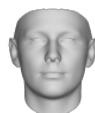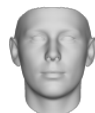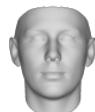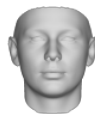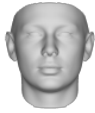

Tran17

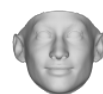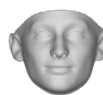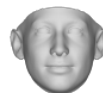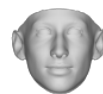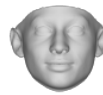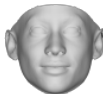

MoFA

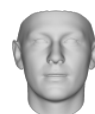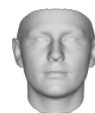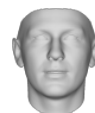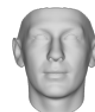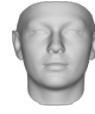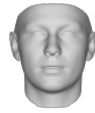

Genova18

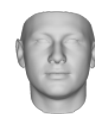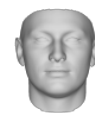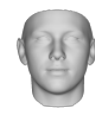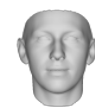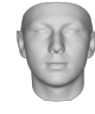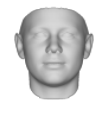

Supplement: Supplementary file 2 [file Wu_MVF-Net_Multi-View_3D_CVPR_2019_supplemental.zip]
