# Supplementary material
Source: ML conference proceedings conference paper supplement (https://openaccess.thecvf.com/content/CVPR_2019/html/Wu_MVF-Net_Multi-View_3D_CVPR_2019_paper.html)
Supplement: Supplementary file 3 [file Wu_MVF-Net_Multi-View_3D_CVPR_2019_supplemental.zip]

Archive with 8 entries (5 files):
- 0666-supp/
- 0666-supp/0666-supp.pdf
- __MACOSX/
- __MACOSX/0666-supp/
- __MACOSX/0666-supp/._0666-supp.pdf
- 0666-supp/videodata.mp4
- __MACOSX/0666-supp/._videodata.mp4
- __MACOSX/._0666-supp
